# Supplementary material for: Gene silencing induced by oxidative DNA base damage: association with local decrease of histone H4 acetylation in the promoter region
Source: PubMed Central journal article supplement — Nucleic Acids Res. 2010 Mar 24;38(13):4285–95. doi: 10.1093/nar/gkq170 (PMC2910050; doi:10.1093/nar/gkq170), 2010-03-24
Supplement: gkq170_1.pdf [file gkq170_1.pdf]

Andriy Khobta\*, Simon Anderhub, Nataliya Kitsera, and Bernd Epe

## **Gene silencing induced by oxidative DNA base damage: association with local decrease of histone H4 acetylation in the promoter region**

### **Supplementary Material**

#### **Legends to Supplementary Figures**

**Supplementary Figure S1.** Effects of various doses of oxidative DNA base damage on the expression of plasmid DNA in HeLa cells. Light exposure of 100 s in presence of methylene blue induced approximately one Fpg-sensitive base modification per plasmid molecule. Cells were transfected with the indicated amounts of either pZA (encoding for GFP), pDsRed (encoding for DsRed-Monomer), or co-transfected with both plasmids, one of which was damaged as indicated. (A) Dot density plots obtained by flow-cytometry of the transfected cells fixed 24 hours after transfections. (B) Expression of the damaged genes. Median fluorescence per cell calculated from the data shown in A in the cells with high expression levels of the reference undamaged plasmids, as described in Materials and Methods. Dotted lines show the background fluorescence levels in the cells transfected with reference plasmids only.

**Supplementary Figure S2.** Time course of expression of DsRed-Monomer in HeLa cells co-transfected with 100 ng of pZA (undamaged tracer plasmid) and 700 ng pDsRed dark-incubated in presence of methylene blue ( $\text{oG}=0$ ) or exposed to a dose of visible light generating approximately 3 Fpg-sensitive sites per plasmid molecule ( $\text{oG}=3$ ). (A) Dot density plots obtained by flow-cytometry of the transfected cells fixed at the indicated times after transfections. (B) Quantification of expression of the damaged pDsRed plasmid relative to the non-damaged pDsRed (red data series, mean and data range of two parallel transfection experiments). The expression of the pZA plasmid exposed to the same damaging conditions relative to the non-damaged pZA is plotted for comparison (green data series).

**Supplementary Figure S3.** Quantitative analyses of the association of acetylated histone H4 (AcH4) with promoter regions of the plasmid genes (DsRed-Monomer and GFP). Data of five ChIP experiments independently performed with chromatin preparations obtained from three independent transfections. In each ChIP experiment, recoveries of the promoter fragment of pZA plasmids (each containing no (oG=0) or three (oG=3) Fpg-sensitive oxidative base modifications) are directly compared to the recoveries of the corresponding fragment of pDsRed (undamaged reference) measured in the same sample. Filled bars: immunoprecipitations with antibody specific to AcH4; open bars: immunoprecipitations with non-immune IgG. Error bars show standard deviation of the mean calculated from n real-time PCR determinations.

Supplementary Figure S1

A

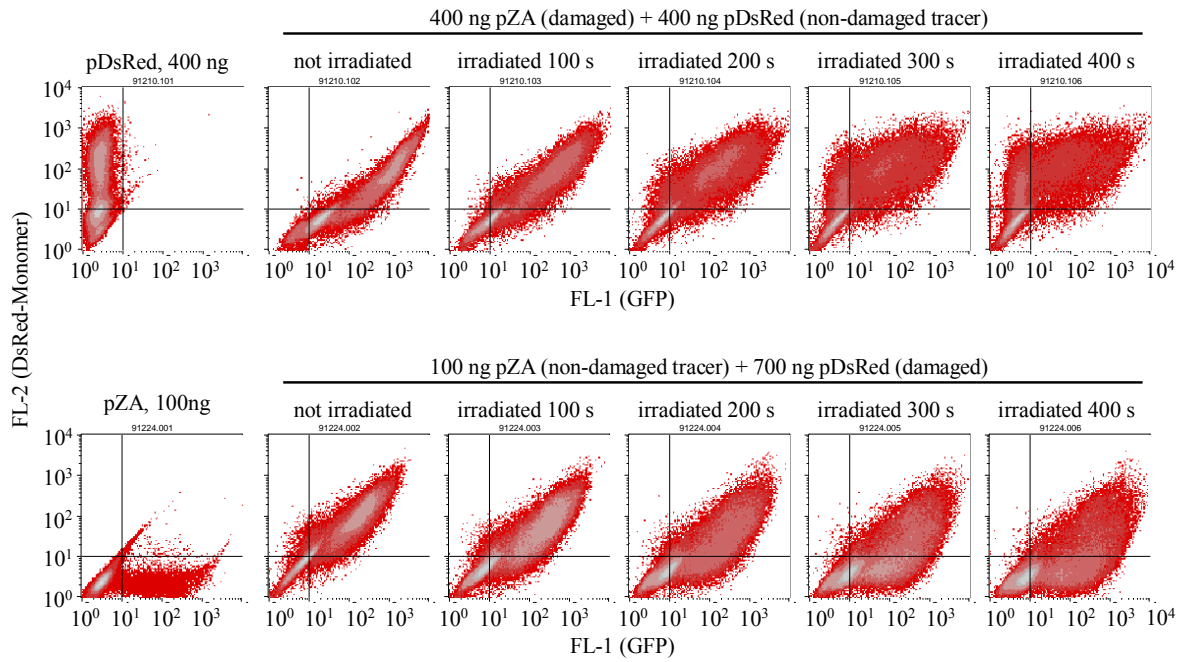

B

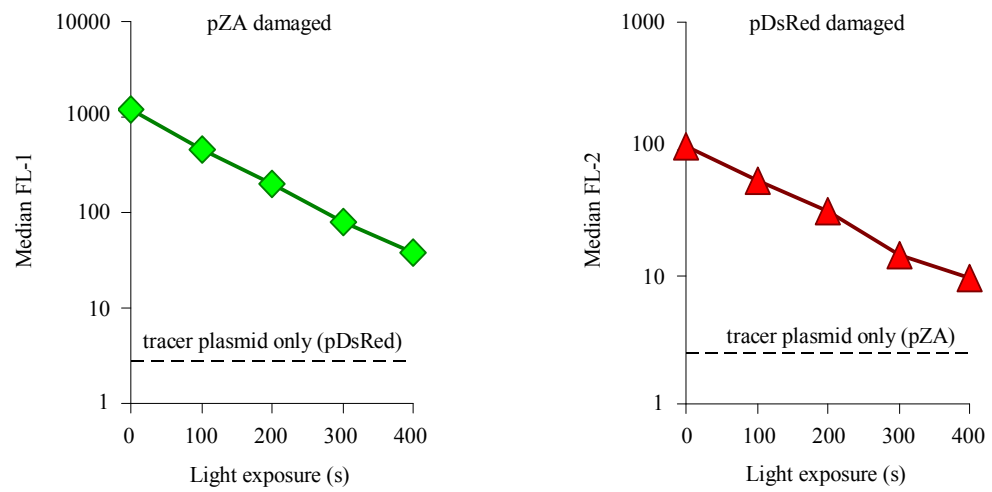

Supplementary Figure S2

A

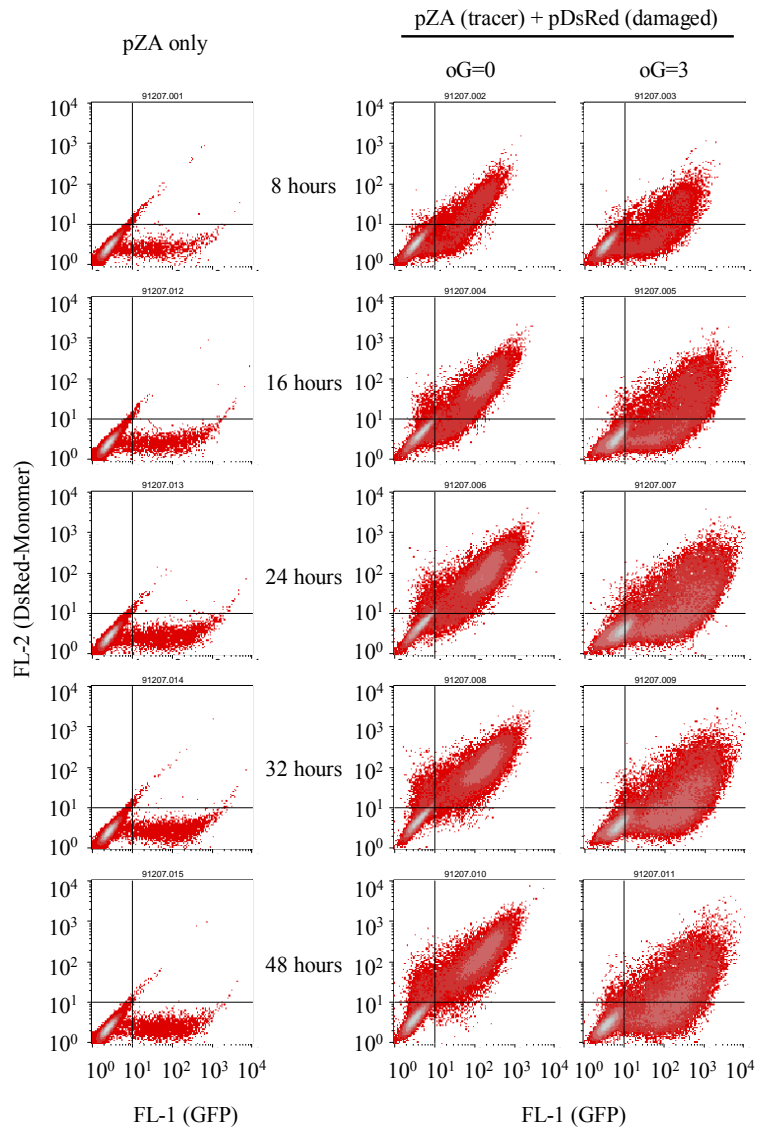

B

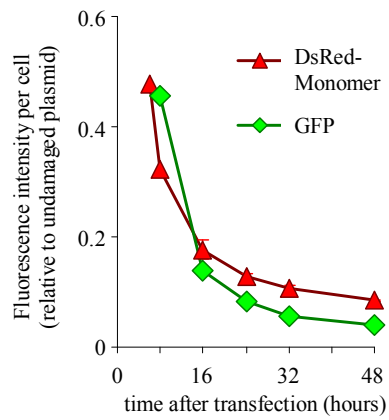

Supplementary Figure S3

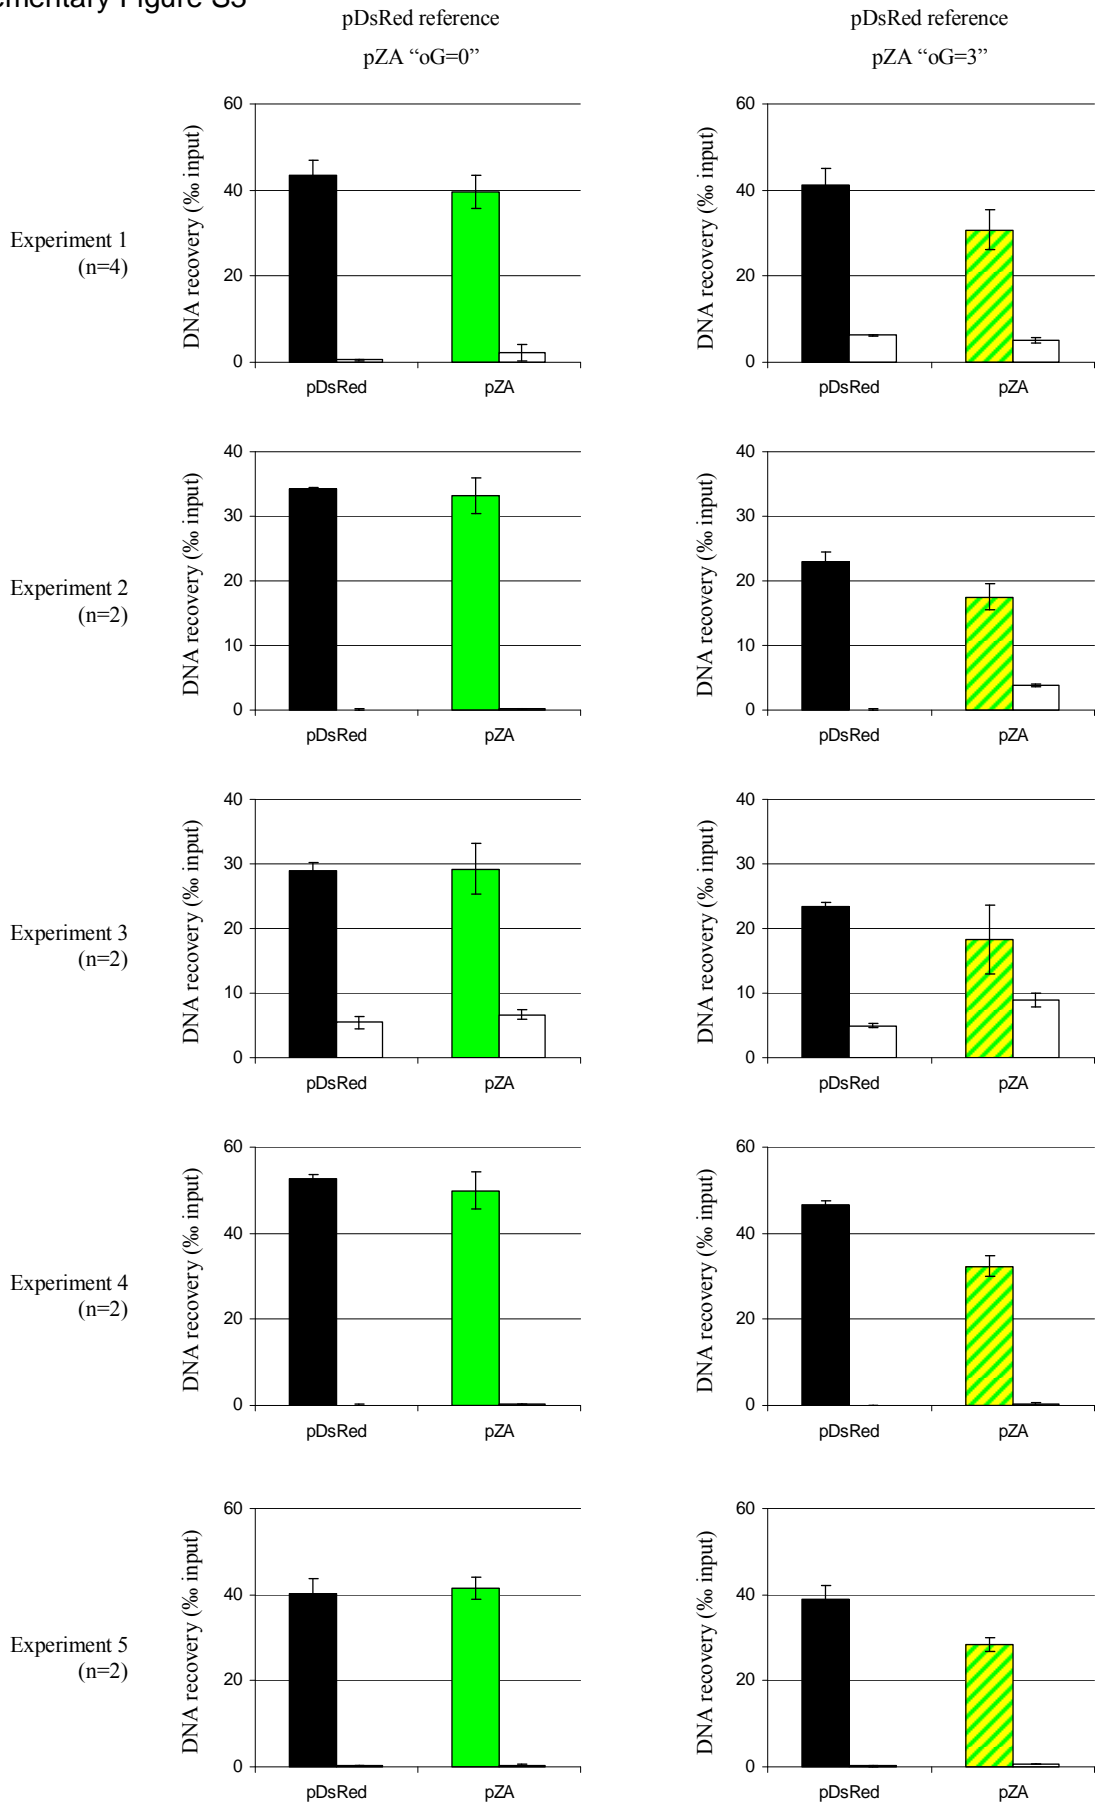

## Supplementary Tables

**Supplementary Table S1.** Antibodies used in chromatin immunoprecipitation (ChIP).

| Specificity                       | Designation | Manufacturer              | Cat. No. | Origin, type          | Amount used in ChIP |
|-----------------------------------|-------------|---------------------------|----------|-----------------------|---------------------|
| Non-immune                        | N-Imm       | Chemicon                  | PP64     | Rabbit IgG            | 8 $\mu$ g           |
| RNA Polymerase II                 | Pol2        | Upstate                   | 05-952   | Mouse ascites         | 8 $\mu$ l           |
| Histone H1                        | H1          | Santa Cruz Biotechnology  | sc-8030  | Mouse monoclonal IgG  | 8 $\mu$ g           |
| Acetyl-histone H3 (K9, 14)        | AcH3        | Upstate                   | 06-599   | Rabbit polyclonal IgG | 8 $\mu$ l           |
| Acetyl-histone H4 (K5, 8, 12, 16) | AcH4        | Upstate                   | 06-866   | Rabbit antiserum      | 8 $\mu$ l           |
| di-methyl-histone H3 (K9)         | H3K9Me2     | Cell Signaling Technology | 9753     | Rabbit                | 8 $\mu$ l           |
| tri-methyl –histone H3 (K27)      | H3K27Me3    | Cell Signaling Technology | 9733     | Rabbit mAb            | 8 $\mu$ l           |

**Supplementary Table S2.** Oligonucleotides used for ChIP analyses.

PCR-amplified DNA fragments are listed as the regions of the plasmid DNA (pZA or pDsRed) or as the chromosome regions according to the human gene nomenclature.

| Target DNA fragment   | Template      | position relative to the transcripti on start | Sequence (5' → 3')    | T <sub>ann</sub> (°C) <sup>a</sup> | T <sub>acq</sub> (°C) <sup>b</sup> | PCR product length (bp) |
|-----------------------|---------------|-----------------------------------------------|-----------------------|------------------------------------|------------------------------------|-------------------------|
| promoter <sup>c</sup> | pZA, pDsRed   | -46                                           | TGTACGGTGGGAGGTCTAT   |                                    |                                    |                         |
|                       | pZA           | +182                                          | GGTGGTGCAGATGAACTTC   | 65                                 | 88                                 | 228                     |
|                       | pDsRed        | +187                                          | CCCTCGATCTCGAAGTAGTG  | 65                                 | 86                                 | 233                     |
| CDS                   | pZA           | +156                                          | CTGACCCTGAAGTTCATCTG  |                                    |                                    |                         |
|                       |               | +355                                          | GTCTTGTAGTTGCCGTCGTC  | 65                                 | 88                                 | 200                     |
| 3'UTR                 | pZA           | +570                                          | GACCACTACCAGCAGAACAC  |                                    |                                    |                         |
|                       |               | +785                                          | GCCTGTGCTTCTGCTAGGAT  | 65                                 | 88                                 | 216                     |
| <i>GAPDH</i>          | chromosome 12 | -121                                          | TAGCTCAGGCCTCAAGACCTT |                                    |                                    |                         |
|                       |               | +40                                           | AAGAAGATGCGGCTGACTGTC | 65                                 | 88                                 | 161                     |
| <i>MYOD1</i>          | chromosome 11 | -93                                           | TTCCTATTGGCCTCGGACTC  |                                    |                                    |                         |
|                       |               | +120                                          | AAGTGCTGGCAGTCTGAATG  | 65                                 | 84                                 | 213                     |
| <i>AFM</i>            | chromosome 4  | +438                                          | GGTAACAGTGGAACAATAGAT |                                    |                                    |                         |
|                       |               | +674                                          | ACACCTCCTCTAGACATATGA | 60                                 | 78                                 | 237                     |

<sup>a</sup> Annealing temperature during the PCR reactions

<sup>b</sup> Fluorescence acquisition temperature during the PCR reactions.

<sup>c</sup> The amplified fragment corresponds to the proximal promoter region including the transcription start site

**Supplementary Table S3.** Oligonucleotides used for cDNA analyses.

| Target transcript | Amplified templates | Sequence (5' → 3')                            | T <sub>ann</sub> (°C) <sup>d</sup> | T <sub>acq</sub> (°C) <sup>e</sup> | PCR product length (bp) |
|-------------------|---------------------|-----------------------------------------------|------------------------------------|------------------------------------|-------------------------|
| GFP               | pZA, cDNA           | CTGACCCTGAAGTTCATCTG<br>GTCTTGTAGTTGCCGTCGTC  | 65                                 | 88                                 | 200                     |
| DsRed-Monomer     | pDsRed, cDNA        | TCAAGGAGTTCATGCAGTTC<br>GAAGGACAGCTTCATGTAGT  | 65                                 | 88                                 | 239                     |
| GAPDH             | exon 9, cDNA        | AAGAGCACAAGAGGAAGAGA<br>TTATTGATGGTACATGACAAG | 60                                 | 84                                 | 158                     |
| MYOD1             | exon 3, cDNA        | CTAGACTGCCTGTCCAGCAT<br>CAGAGCACCTGGTATATCGG  | 65                                 | 84                                 | 218                     |
| AFM               | exon 8, cDNA        | GCAAGGTTATGAACCATATT<br>GGTCAGCATCTCGTTCTT    | 60                                 | 78                                 | 195                     |

<sup>d</sup> Annealing temperature during the PCR reactions<sup>e</sup> Fluorescence acquisition temperature during the PCR reactions.
